# Supplementary material for: Evaluation of Glyoxal-Based Electrolytes for Lithium-Sulfur Batteries
Source: MDPI journal article supplement (doi:10.3390/batteries9040210), 2023-03-31
Supplement: s1 [file s1]

## Supporting Information:

### Evaluation of glyoxal-based electrolytes for lithium-sulfur-batteries

Sebastian Kirchhoff<sup>1,2</sup>, Christian Leibing<sup>3,4</sup>, Paul Härtel<sup>1</sup>, Thomas Abendroth<sup>1</sup>, Susanne Dörfler<sup>1</sup>, Holger Althues<sup>\*,1</sup>  
Stefan Kaskel<sup>1,2</sup> and Andrea Balducci<sup>3,4</sup>

#### 1. Stability tests against Lithium + Polysulfides

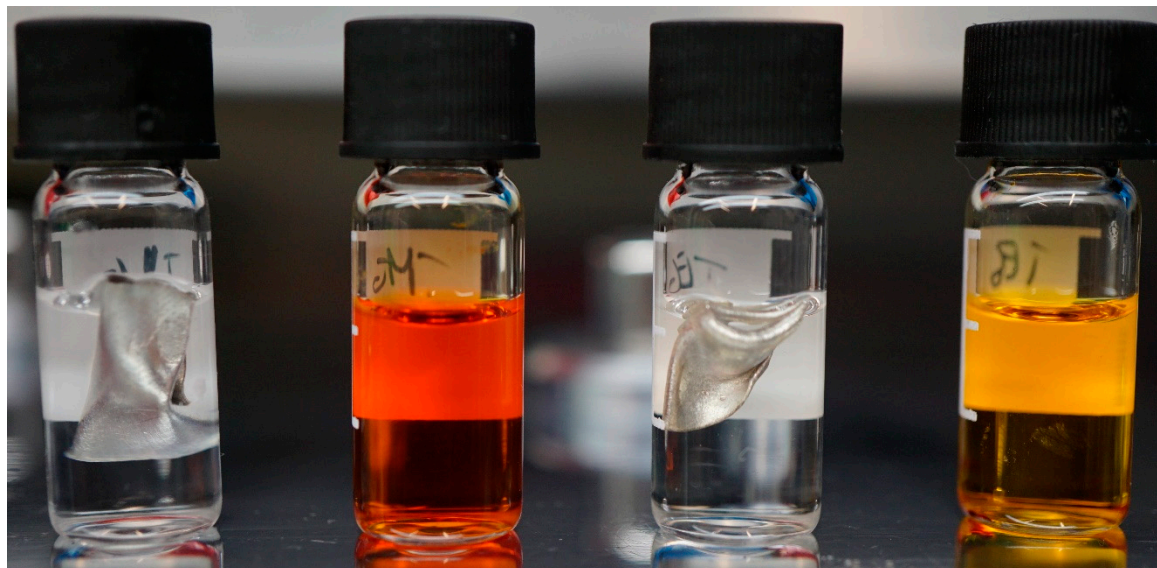

**Figure S1.** Stability tests of glyoxal-based solvents against lithium and polysulfides: TMG (left) and TEG (right).

## 2. Further voltage profiles of the developed electrolytes

### 2.1 Voltage profiles for adjusted TMG:DOL electrolytes with 1 M LiTFSI

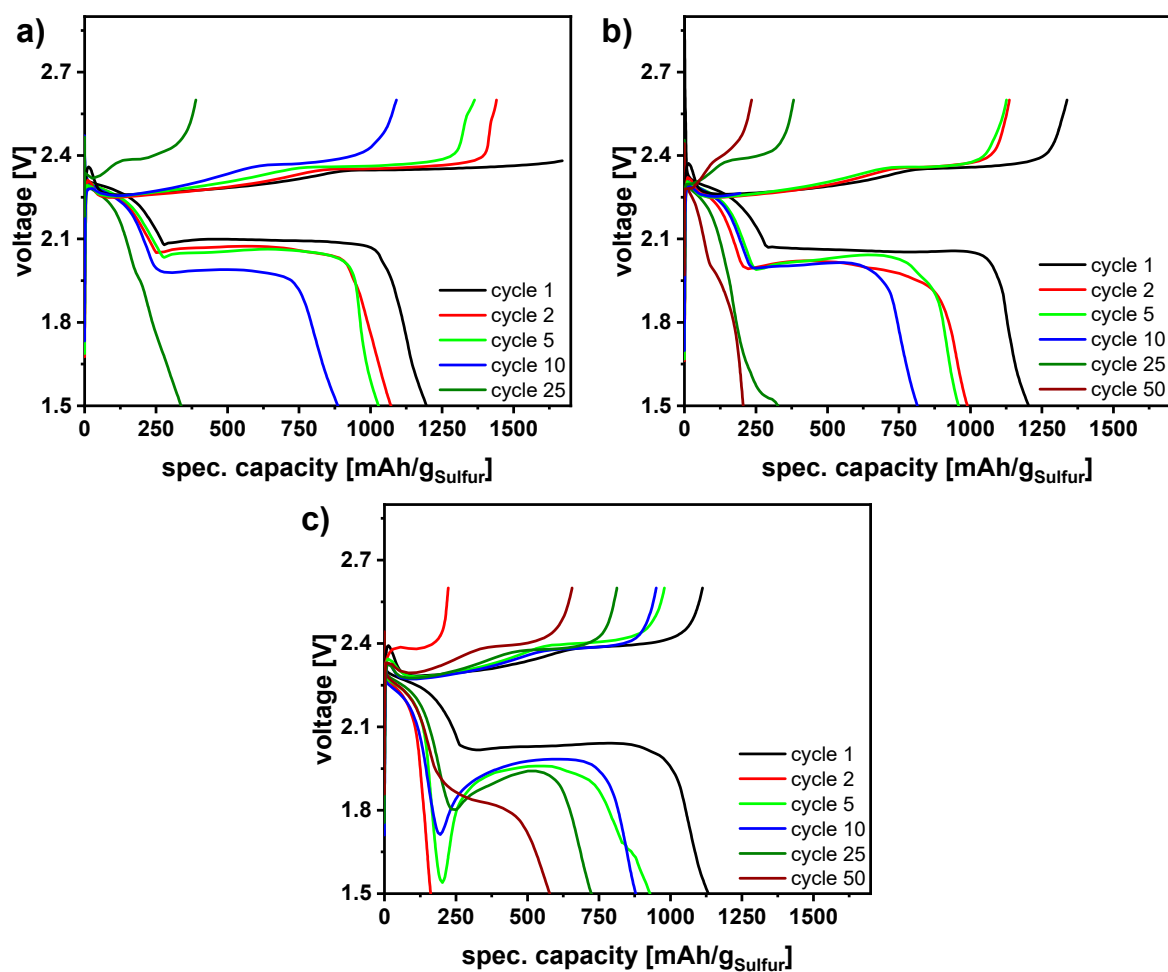

**Figure S2.** Voltage profiles of TMG:DOL electrolytes with 1 M LiTFSI: (a) TMG:DOL 1:1, (b) TMG:DOL 3:1, (c) TMG:DOL 9:1.

## 2.2 Influence of salt concentration

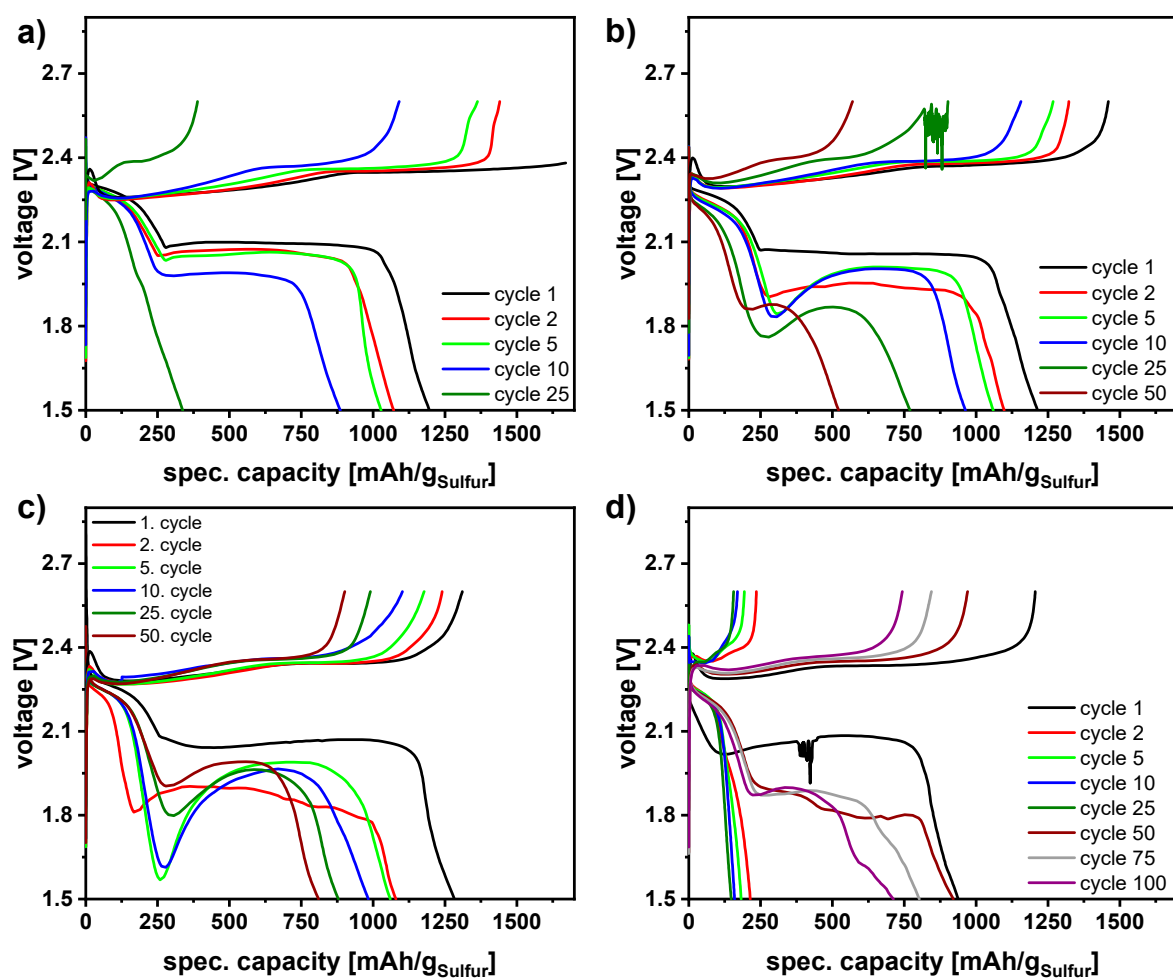

Figure S3. Voltage profiles of TMG:DOL 1:1 with varying LiTFSI concentration: (a) 1 M, (b) 1.5 M, (c) 2 M, (d) 3 M.

### 2.3 Voltage profiles of optimized glyoxal-based solvent blends with DOL + DOL-reference

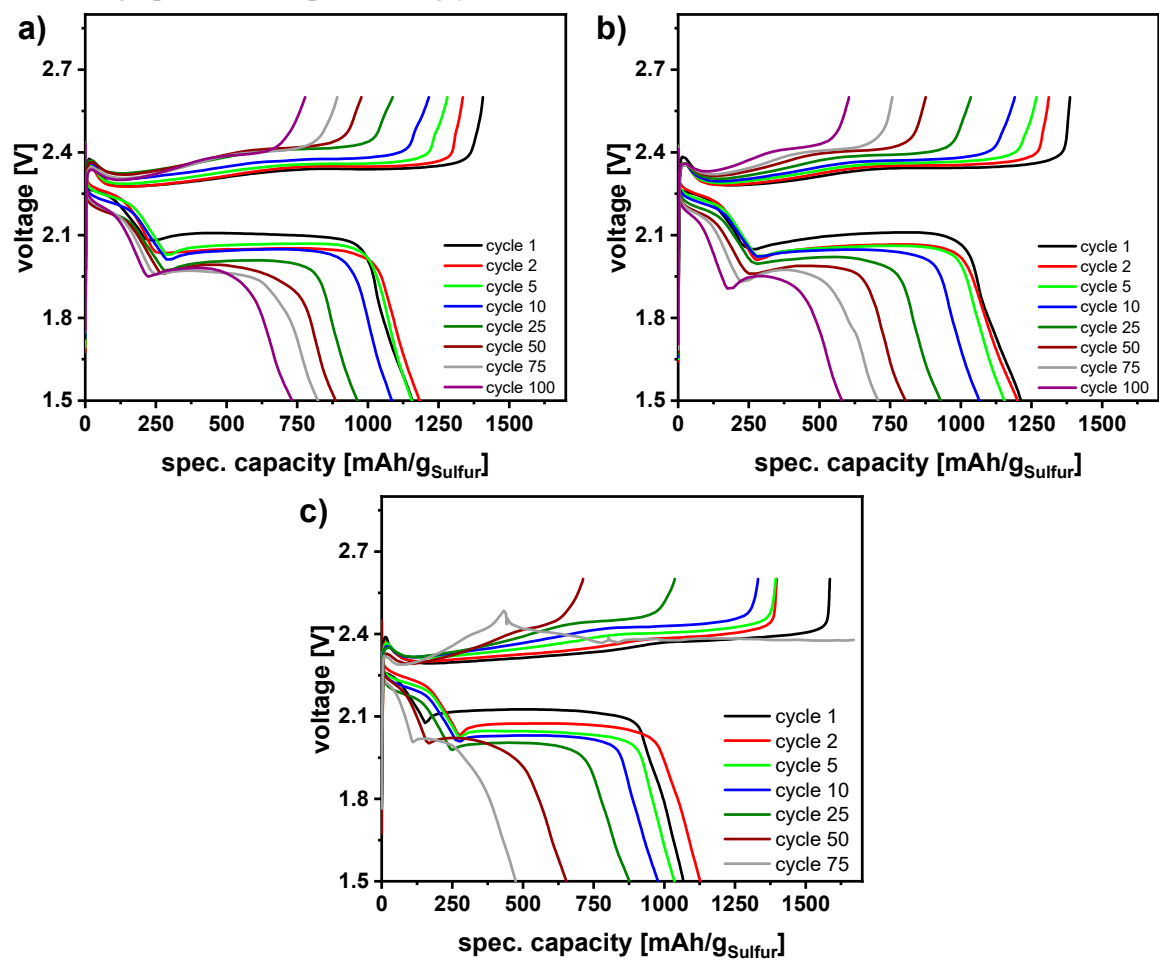

**Figure S4.** Voltage profiles of optimized electrolytes + reference: (a) TMG:DOL 1:3, 2 M LiTFSI, (b) TEG:DOL 1:3, 2 M LiTFSI, (c) DOL, 2 M LiTFSI.

### 3. Thermogravimetric Analysis

For the four solvent blends of glyoxal solvent and DOL with 2 M LiTFSI thermogravimetric analysis were performed, shown in Figure S5.

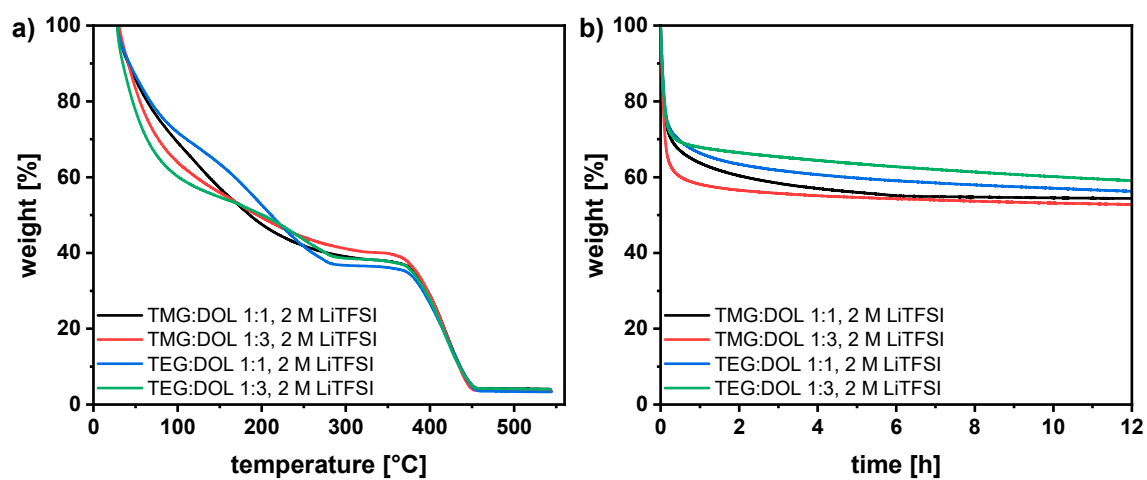

**Figure S5.** Thermogravimetric analysis of TXG:DOL solvent blends with 2 M LiTFSI: (a) Temperature ramp to 550 °C, (b) Isotherme at 60 °C.

#### 4. Post Mortem Analysis of lithium-sulfur pouch cells

The pouch cells were disassembled after cycling and photos of the cell components were taken. In Figure S6 a representative picture of a lithium anode and a separator of each cell is shown.

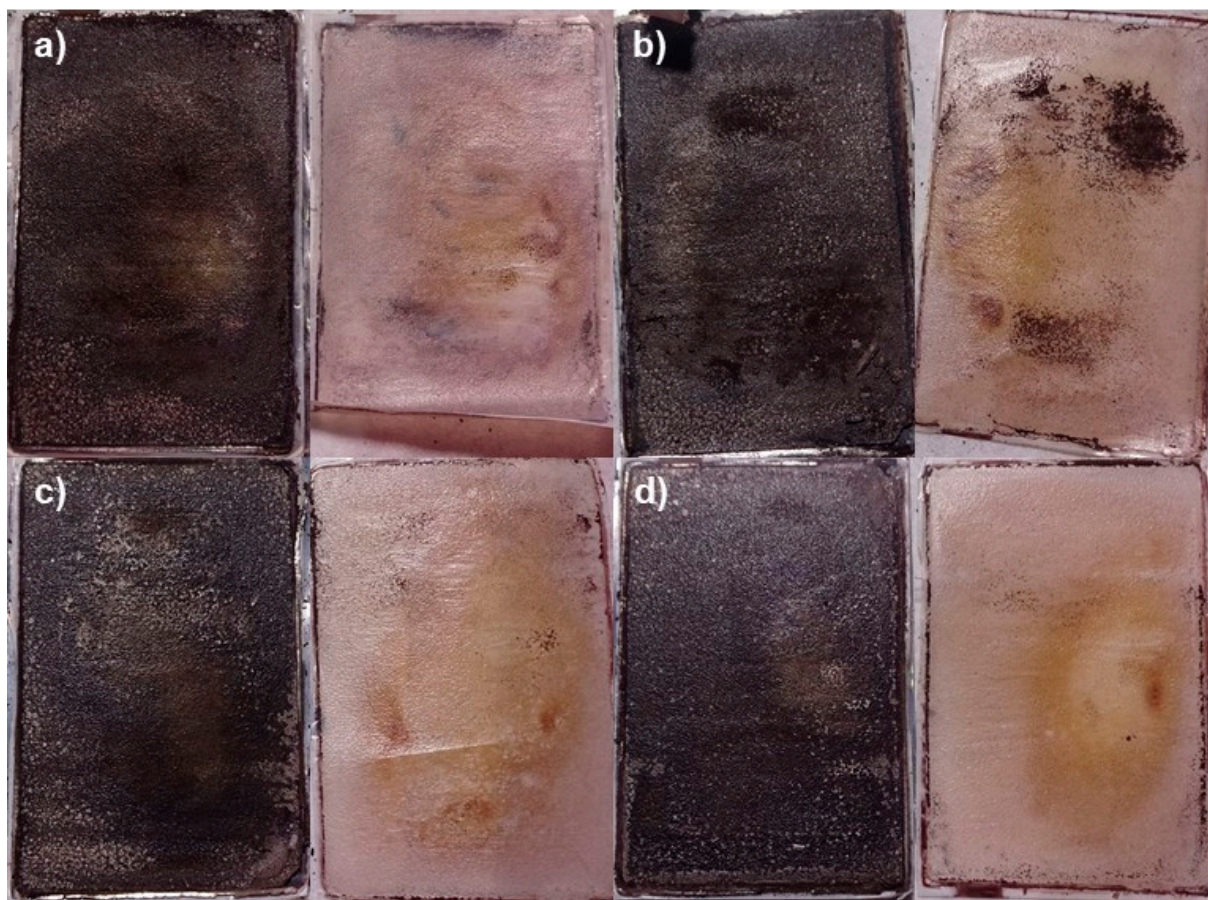

**Figure S6.** *Post Mortem* Analysis of lithium sulfur pouch cells: Lithium (left) and separator (right), (a,b) cell 1 and 2 with TMG:DOL 1:3, 2 M LiTFSI, (c,d) with TEG:DOL 1:3, 2 M LiTFSI.
